# Supplementary material for: A Bio-Indicator Pilot Study Screening Selected Heavy Metals in Female Hair, Nails, and Serum from Lifestyle Cosmetic, Canned Food, and Manufactured Drink Choices
Source: MDPI journal article supplement (doi:10.3390/molecules28145582), 2023-07-22
Supplement: s1 [file s1]

**Table S1. Protein, Hormone, Gene, and their Receptors used in AutoDock analysis**

| Target (Protein, Hormone, Gene, and their Receptors) from PDB (3D Structures) |                |      |                                                                                    | PDB Information                                                                                                                                                                                                                                                                                                                                                                                                                                                                                                                                                                                                                                                                                                                                                                                                                                                                                                                                                                                      |
|-------------------------------------------------------------------------------|----------------|------|------------------------------------------------------------------------------------|------------------------------------------------------------------------------------------------------------------------------------------------------------------------------------------------------------------------------------------------------------------------------------------------------------------------------------------------------------------------------------------------------------------------------------------------------------------------------------------------------------------------------------------------------------------------------------------------------------------------------------------------------------------------------------------------------------------------------------------------------------------------------------------------------------------------------------------------------------------------------------------------------------------------------------------------------------------------------------------------------|
| Cholinesterase                                                                | Target Protein | 1P0P | 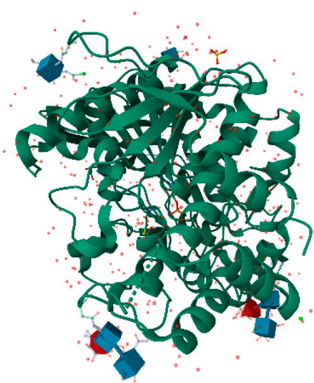 | <p>1P0P</p> <p>Crystal structure of soman-aged human butyryl cholinesterase in complex with the substrate analog butyrylthiocholine</p> <ul style="list-style-type: none"> <li>• <b>PDB</b><br/>DOI: <a href="https://doi.org/10.2210/pdb1P0P/pdb">https://doi.org/10.2210/pdb1P0P/pdb</a></li> <li>• <b>Classification:</b> <b>HYDROLASE</b></li> <li>• <b>Organism(s):</b> <u>Homo sapiens</u></li> <li>• <b>Expression System:</b> <u>Cricetulus griseus</u></li> <li>• <b>Mutation(s):</b> Yes</li> <li>• <b>Deposited:</b> 2003-04-10 <b>Released:</b> 2003-08-05</li> <li>• <b>Deposition Author(s):</b> <u>Nicolet, Y., Lockridge, O., Masson, P., Fontecilla-Camps, J.C., Nachon, F.</u></li> </ul> <p><b>Experimental Data Snapshot</b></p> <ul style="list-style-type: none"> <li>• <b>Method:</b> X-RAY DIFFRACTION</li> <li>• <b>Resolution:</b> 2.30 Å</li> <li>• <b>R-Value Free:</b> 0.242</li> <li>• <b>R-Value Work:</b> 0.199</li> <li>• <b>R-Value Observed:</b> 0.199</li> </ul> |

|  |                    |      |                                                                                   |                                                                                                                                                                                                                                                                                                                                                                                                                                                                                                                                                                                                                                                                                                                                                                                                                                                                                                                                                                                                                                                                                  |
|--|--------------------|------|-----------------------------------------------------------------------------------|----------------------------------------------------------------------------------------------------------------------------------------------------------------------------------------------------------------------------------------------------------------------------------------------------------------------------------------------------------------------------------------------------------------------------------------------------------------------------------------------------------------------------------------------------------------------------------------------------------------------------------------------------------------------------------------------------------------------------------------------------------------------------------------------------------------------------------------------------------------------------------------------------------------------------------------------------------------------------------------------------------------------------------------------------------------------------------|
|  | Target<br>Receptor | 6EP4 |  | <p>6EP4</p> <p>Human butyrylcholinesterase in complex with decamethonium</p> <ul style="list-style-type: none"><li>• <b>PDB</b><br/>DOI: <a href="https://doi.org/10.2210/pdb6EP4/pdb">https://doi.org/10.2210/pdb6EP4/pdb</a></li><li>• <b>Classification:</b> <b>HYDROLASE</b></li><li>• <b>Organism(s):</b> <u>Homo sapiens</u></li><li>• <b>Expression System:</b> <u>Cricetulus griseus</u></li><li>• <b>Mutation(s):</b> Yes</li><li>• <b>Deposited:</b> 2017-10-10 <b>Released:</b> 2017-12-13</li><li>• <b>Deposition Author(s):</b> <u>Nachon, F.</u>, <u>Brazzolotto, X.</u>, <u>Wandhammer, M.</u>, <u>Trovaslet-Leroy, M.</u>, <u>Rosenberry, T.L.</u>, <u>Macdonald, I.R.</u>, <u>Darvesh, S.</u></li><li>• <b>Funding Organization(s):</b> French Ministry of Defense</li></ul> <p><b>Experimental Data Snapshot</b></p> <ul style="list-style-type: none"><li>• <b>Method:</b> X-RAY DIFFRACTION</li><li>• <b>Resolution:</b> 2.30 Å</li><li>• <b>R-Value Free:</b> 0.217</li><li>• <b>R-Value Work:</b> 0.179</li><li>• <b>R-Value Observed:</b> 0.181</li></ul> |
|--|--------------------|------|-----------------------------------------------------------------------------------|----------------------------------------------------------------------------------------------------------------------------------------------------------------------------------------------------------------------------------------------------------------------------------------------------------------------------------------------------------------------------------------------------------------------------------------------------------------------------------------------------------------------------------------------------------------------------------------------------------------------------------------------------------------------------------------------------------------------------------------------------------------------------------------------------------------------------------------------------------------------------------------------------------------------------------------------------------------------------------------------------------------------------------------------------------------------------------|

|     |                |      |                                                                                     |                                                                                                                                                                                                                                                                                                                                                                                                                                                                                                                                                                                                                                                                                                                                                                                                                                                                                                                                                                                                                                                                                                                                                                                    |
|-----|----------------|------|-------------------------------------------------------------------------------------|------------------------------------------------------------------------------------------------------------------------------------------------------------------------------------------------------------------------------------------------------------------------------------------------------------------------------------------------------------------------------------------------------------------------------------------------------------------------------------------------------------------------------------------------------------------------------------------------------------------------------------------------------------------------------------------------------------------------------------------------------------------------------------------------------------------------------------------------------------------------------------------------------------------------------------------------------------------------------------------------------------------------------------------------------------------------------------------------------------------------------------------------------------------------------------|
| P53 | Target Protein | 7VOU |    | <p>7VOU</p> <p><i>The crystal structure of human forkhead box protein in complex with DNA I</i></p> <ul style="list-style-type: none"> <li>• <b>PDB</b><br/>DOI: <a href="https://doi.org/10.2210/pdb7VOU/pdb">https://doi.org/10.2210/pdb7VOU/pdb</a></li> <li>• <b>NDB:</b> <a href="#">7VOU</a></li> <li>• <b>Classification:</b> <b><u>TRANSCRIPTION/DNA</u></b></li> <li>• <b>Organism(s):</b> <a href="#">Homo sapiens</a></li> <li>• <b>Expression System:</b> <a href="#">Escherichia coli</a></li> <li>• <b>Mutation(s):</b> No</li> <li>• <b>Deposited:</b> 2021-10-14 <b>Released:</b> 2022-08-17</li> <li>• <b>Deposition Author(s):</b> <a href="#">Choi, Y.</a>, <a href="#">Yoon, H.J.</a>, <a href="#">Lee, H.H.</a></li> <li>• <b>Funding Organization(s):</b> National Research Foundation (NRF, Korea)</li> </ul> <p><b>Experimental Data Snapshot</b></p> <ul style="list-style-type: none"> <li>• <b>Method:</b> X-RAY DIFFRACTION</li> <li>• <b>Resolution:</b> 3.10 Å</li> <li>• <b>R-Value Free:</b> 0.280</li> <li>• <b>R-Value Work:</b> 0.221</li> <li>• <b>R-Value Observed:</b> 0.227</li> </ul>                                                      |
|     |                | 2LY4 |  | <p>2LY4</p> <p><i>HMGB1-facilitated p53 DNA binding occurs via HMG-box/p53 transactivation domain interaction and is regulated by the acidic tail</i></p> <ul style="list-style-type: none"> <li>• <b>PDB</b><br/>DOI: <a href="https://doi.org/10.2210/pdb2LY4/pdb">https://doi.org/10.2210/pdb2LY4/pdb</a></li> <li>• <b>BMRB:</b> <a href="#">18709</a></li> <li>• <b>Classification:</b> <b><u>NUCLEAR PROTEIN/ANTITUMOUR PROTEIN</u></b></li> <li>• <b>Organism(s):</b> <a href="#">Homo sapiens</a></li> <li>• <b>Expression System:</b> <a href="#">Escherichia coli</a></li> <li>• <b>Mutation(s):</b> No</li> <li>• <b>Deposited:</b> 2012-09-12 <b>Released:</b> 2012-10-31</li> <li>• <b>Deposition Author(s):</b> <a href="#">Rowell, J.P.</a>, <a href="#">Simpson, K.L.</a>, <a href="#">Stott, K.</a>, <a href="#">Watson, M.</a>, <a href="#">Thomas, J.O.</a></li> </ul> <p><b>Experimental Data Snapshot</b></p> <ul style="list-style-type: none"> <li>• <b>Method:</b> SOLUTION NMR</li> <li>• <b>Conformers Calculated:</b> 100</li> <li>• <b>Conformers Submitted:</b> 10</li> <li>• <b>Selection Criteria:</b> structures with the lowest energy</li> </ul> |

|                 |  |      |                                                                                     |                                                                                                                                                                                                                                                                                                                                                                                                                                                                                                                                                                                                                                                                                                                                                                                                                                                                                                                                                                                                                                                                                                                             |
|-----------------|--|------|-------------------------------------------------------------------------------------|-----------------------------------------------------------------------------------------------------------------------------------------------------------------------------------------------------------------------------------------------------------------------------------------------------------------------------------------------------------------------------------------------------------------------------------------------------------------------------------------------------------------------------------------------------------------------------------------------------------------------------------------------------------------------------------------------------------------------------------------------------------------------------------------------------------------------------------------------------------------------------------------------------------------------------------------------------------------------------------------------------------------------------------------------------------------------------------------------------------------------------|
|                 |  | 2JTX | 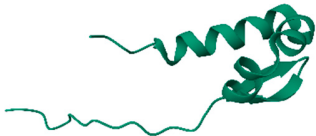   | <p>2JTX</p> <p><i>NMR structure of the TFIIIE-alpha carboxyl terminus</i></p> <ul style="list-style-type: none"> <li>• <b>PDB</b><br/>DOI: <a href="https://doi.org/10.2210/pdb2JTX/pdb">https://doi.org/10.2210/pdb2JTX/pdb</a></li> <li>• <b>Classification:</b> <b>TRANSCRIPTION</b></li> <li>• <b>Organism(s):</b> <i>Homo sapiens</i></li> <li>• <b>Expression System:</b> <i>Escherichia coli</i></li> <li>• <b>Mutation(s):</b> No</li> <li>• <b>Deposited:</b> 2007-08-08 <b>Released:</b> 2007-12-11</li> <li>• <b>Deposition Author(s):</b> <a href="#">Di Lello, P.</a>, <a href="#">Omichinski, J.G.</a></li> </ul> <p><b>Experimental Data Snapshot</b></p> <ul style="list-style-type: none"> <li>• <b>Method:</b> SOLUTION NMR</li> <li>• <b>Conformers Calculated:</b> 50</li> <li>• <b>Conformers Submitted:</b> 20</li> <li>• <b>Selection Criteria:</b> structures with the lowest energy</li> </ul>                                                                                                                                                                                                     |
| Target Receptor |  | 6VTH |  | <p>6VTH</p> <p><i>p53-specific T cell receptor</i></p> <ul style="list-style-type: none"> <li>• <b>PDB</b><br/>DOI: <a href="https://doi.org/10.2210/pdb6VTH/pdb">https://doi.org/10.2210/pdb6VTH/pdb</a></li> <li>• <b>Classification:</b> <b>IMMUNE SYSTEM</b></li> <li>• <b>Organism(s):</b> <i>Homo sapiens</i></li> <li>• <b>Expression System:</b> <i>Escherichia coli</i></li> <li>• <b>Mutation(s):</b> No</li> <li>• <b>Deposited:</b> 2020-02-12 <b>Released:</b> 2020-06-17</li> <li>• <b>Deposition Author(s):</b> <a href="#">Wu, D.</a>, <a href="#">Gallagher, D.T.</a>, <a href="#">Gowthaman, R.</a>, <a href="#">Pierce, B.G.</a>, <a href="#">Mariuzza, R.A.</a></li> <li>• <b>Funding Organization(s):</b> National Institutes of Health/National Institute of General Medical Sciences (NIH/NIGMS)</li> </ul> <p><b>Experimental Data Snapshot</b></p> <ul style="list-style-type: none"> <li>• <b>Method:</b> X-RAY DIFFRACTION</li> <li>• <b>Resolution:</b> 2.36 Å</li> <li>• <b>R-Value Free:</b> 0.264</li> <li>• <b>R-Value Work:</b> 0.211</li> <li>• <b>R-Value Observed:</b> 0.214</li> </ul> |

|          |                 |      |                                                                                     |                                                                                                                                                                                                                                                                                                                                                                                                                                                                                                                                                                                                                                                                                                                                                                                                                                                                                                                                                                                                                                                                                                                                                            |
|----------|-----------------|------|-------------------------------------------------------------------------------------|------------------------------------------------------------------------------------------------------------------------------------------------------------------------------------------------------------------------------------------------------------------------------------------------------------------------------------------------------------------------------------------------------------------------------------------------------------------------------------------------------------------------------------------------------------------------------------------------------------------------------------------------------------------------------------------------------------------------------------------------------------------------------------------------------------------------------------------------------------------------------------------------------------------------------------------------------------------------------------------------------------------------------------------------------------------------------------------------------------------------------------------------------------|
| Dopamine | Target Protein  | 5PAH | 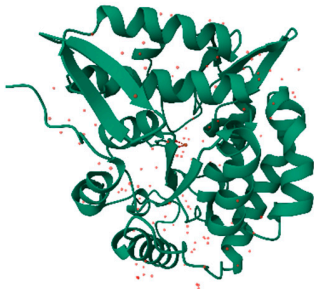   | <p>5PAH</p> <p><i>HUMAN PHENYLALANINE HYDROXYLASE CATALYTIC DOMAIN DIMER WITH BOUND DOPAMINE INHIBITOR</i></p> <ul style="list-style-type: none"> <li>• <b>PDB</b><br/>DOI: <a href="https://doi.org/10.2210/pdb5PAH/pdb">https://doi.org/10.2210/pdb5PAH/pdb</a></li> <li>• <b>Classification:</b> <b>MONOOXYGENASE</b></li> <li>• <b>Organism(s):</b> <u>Homo sapiens</u></li> <li>• <b>Expression System:</b> <u>Escherichia coli</u></li> <li>• <b>Mutation(s):</b> No</li> <li>• <b>Deposited:</b> 1998-08-20 <b>Released:</b> 1999-04-27</li> <li>• <b>Deposition Author(s):</b> <u>Erlandsen, H., Flatmark, T., Stevens, R.C.</u></li> </ul> <p><b>Experimental Data Snapshot</b></p> <ul style="list-style-type: none"> <li>• <b>Method:</b> X-RAY DIFFRACTION</li> <li>• <b>Resolution:</b> 2.10 Å</li> <li>• <b>R-Value Free:</b> 0.200</li> <li>• <b>R-Value Work:</b> 0.163</li> <li>• <b>R-Value Observed:</b> 0.163</li> </ul>                                                                                                                                                                                                               |
|          | Target Receptor | 3PBL |  | <p>3PBL</p> <p><i>Structure of the human dopamine D3 receptor in complex with eticlopride</i></p> <ul style="list-style-type: none"> <li>• <b>PDB</b><br/>DOI: <a href="https://doi.org/10.2210/pdb3PBL/pdb">https://doi.org/10.2210/pdb3PBL/pdb</a></li> <li>• <b>Classification:</b> <b>HYDROLASE/HYDROLASE INHIBITOR</b></li> <li>• <b>Organism(s):</b> <u>Homo sapiens, Tequatrovirus T4</u></li> <li>• <b>Expression System:</b> <u>Spodoptera frugiperda</u></li> <li>• <b>Mutation(s):</b> Yes</li> <li>• <b>Membrane Protein:</b> <u>Yes</u></li> <li>• <b>Deposited:</b> 2010-10-20 <b>Released:</b> 2010-11-03</li> <li>• <b>Deposition Author(s):</b> <u>Chien, E.Y.T., Liu, W., Han, G.W., Katritch, V., Zhao, Q., Cherezov, V., Stevens, R.C., Accelerated Technologies Center for Gene to 3D Structure (ATCG3D), GPCR Network (GPCR)</u></li> </ul> <p><b>Experimental Data Snapshot</b></p> <ul style="list-style-type: none"> <li>• <b>Method:</b> X-RAY DIFFRACTION</li> <li>• <b>Resolution:</b> 2.89 Å</li> <li>• <b>R-Value Free:</b> 0.272</li> <li>• <b>R-Value Work:</b> 0.243</li> <li>• <b>R-Value Observed:</b> 0.245</li> </ul> |

|          |                 |      |                                                                                     |                                                                                                                                                                                                                                                                                                                                                                                                                                                                                                                                                                                                                                                                                                                                                                                                                                                                                                                                                                                                                                                       |
|----------|-----------------|------|-------------------------------------------------------------------------------------|-------------------------------------------------------------------------------------------------------------------------------------------------------------------------------------------------------------------------------------------------------------------------------------------------------------------------------------------------------------------------------------------------------------------------------------------------------------------------------------------------------------------------------------------------------------------------------------------------------------------------------------------------------------------------------------------------------------------------------------------------------------------------------------------------------------------------------------------------------------------------------------------------------------------------------------------------------------------------------------------------------------------------------------------------------|
| Estrogen | Target Protein  | 1FDW | 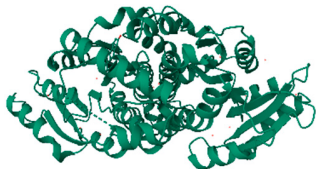   | <p>1FDW</p> <p><i>HUMAN 17-BETA-HYDROXYSTEROID-DEHYDROGENASE TYPE 1 MUTANT H221Q COMPLEXED WITH ESTRADIOL</i></p> <ul style="list-style-type: none"> <li>• <b>PDB</b><br/>DOI: <a href="https://doi.org/10.2210/pdb1FDW/pdb">https://doi.org/10.2210/pdb1FDW/pdb</a></li> <li>• <b>Classification:</b> <b>DEHYDROGENASE</b></li> <li>• <b>Organism(s):</b> <u>Homo sapiens</u></li> <li>• <b>Expression System:</b> <u>Spodoptera frugiperda</u></li> <li>• <b>Mutation(s):</b> Yes</li> <li>• <b>Deposited:</b> 1998-01-16 <b>Released:</b> 1998-05-27</li> <li>• <b>Deposition Author(s):</b> <u>Mazza, C., Breton, R., Housset, D., Fontecilla-Camps, J.-C.</u></li> </ul> <p><b>Experimental Data Snapshot</b></p> <ul style="list-style-type: none"> <li>• <b>Method:</b> X-RAY DIFFRACTION</li> <li>• <b>Resolution:</b> 2.70 Å</li> <li>• <b>R-Value Free:</b> 0.263</li> <li>• <b>R-Value Work:</b> 0.178</li> </ul>                                                                                                                          |
|          | Target Receptor | 1L2J |  | <p>1L2J</p> <p><i>Human Estrogen Receptor beta Ligand-binding Domain in Complex with (R,R)-5,11-cis-diethyl-5,6,11,12-tetrahydrochrysene-2,8-diol</i></p> <ul style="list-style-type: none"> <li>• <b>PDB DOI:</b> <a href="https://doi.org/10.2210/pdb1L2J/pdb">https://doi.org/10.2210/pdb1L2J/pdb</a></li> <li>• <b>Classification:</b> <b>transcription receptor</b></li> <li>• <b>Organism(s):</b> <u>Homo sapiens</u></li> <li>• <b>Expression System:</b> <u>Escherichia coli</u></li> <li>• <b>Mutation(s):</b> No</li> <li>• <b>Deposited:</b> 2002-02-21 <b>Released:</b> 2002-05-01</li> <li>• <b>Deposition Author(s):</b> <u>Shiau, A.K., Barstad, D., Radek, J.T., Meyers, M.J., Nettles, K.W., Katzenellenbogen, B.S., Katzenellenbogen, J.A., Agard, D.A., Greene, G.L.</u></li> </ul> <p><b>Experimental Data Snapshot</b></p> <ul style="list-style-type: none"> <li>• <b>Method:</b> X-RAY DIFFRACTION</li> <li>• <b>Resolution:</b> 2.95 Å</li> <li>• <b>R-Value Free:</b> 0.299</li> <li>• <b>R-Value Work:</b> 0.259</li> </ul> |

|  |  |      |                                                                                     |                                                                                                                                                                                                                                                                                                                                                                                                                                                                                                                                                                                                                                                                                                                                                                                                                                                                                                                                                                                                                                                                                                                                                                                                                                                                               |
|--|--|------|-------------------------------------------------------------------------------------|-------------------------------------------------------------------------------------------------------------------------------------------------------------------------------------------------------------------------------------------------------------------------------------------------------------------------------------------------------------------------------------------------------------------------------------------------------------------------------------------------------------------------------------------------------------------------------------------------------------------------------------------------------------------------------------------------------------------------------------------------------------------------------------------------------------------------------------------------------------------------------------------------------------------------------------------------------------------------------------------------------------------------------------------------------------------------------------------------------------------------------------------------------------------------------------------------------------------------------------------------------------------------------|
|  |  | 4J26 | 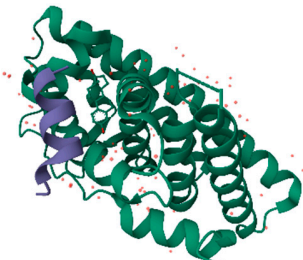   | <p>4J26</p> <p><i>Estrogen Receptor in complex with proline-flanked LXXLL peptides</i></p> <ul style="list-style-type: none"> <li>• <b>PDB DOI:</b> <a href="https://doi.org/10.2210/pdb4J26/pdb">https://doi.org/10.2210/pdb4J26/pdb</a></li> <li>• <b>Classification:</b> <b>HORMONE RECEPTOR/PEPTIDE</b></li> <li>• <b>Organism(s):</b> <i>Homo sapiens</i></li> <li>• <b>Expression System:</b> <i>Escherichia coli</i></li> <li>• <b>Mutation(s):</b> No</li> <li>• <b>Deposited:</b> 2013-02-04 <b>Released:</b> 2013-03-13</li> <li>• <b>Deposition Author(s):</b> <a href="#">Fuchs, S.</a>, <a href="#">Nguyen, H.D.</a>, <a href="#">Phan, T.</a>, <a href="#">Burton, M.</a>, <a href="#">Nieto, L.</a>, <a href="#">de Vries-van Leeuwen, I.</a>, <a href="#">Schmidt, A.</a>, <a href="#">Goodarzifard, M.</a>, <a href="#">Agten, S.</a>, <a href="#">Rose, R.</a>, <a href="#">Ottmann, C.</a>, <a href="#">Milroy, L.G.</a>, <a href="#">Brunsvel, L.</a></li> </ul> <p><b>Experimental Data Snapshot</b></p> <ul style="list-style-type: none"> <li>• <b>Method:</b> X-RAY DIFFRACTION</li> <li>• <b>Resolution:</b> 2.30 Å</li> <li>• <b>R-Value Free:</b> 0.242</li> <li>• <b>R-Value Work:</b> 0.203</li> <li>• <b>R-Value Observed:</b> 0.205</li> </ul> |
|  |  | 4J24 |  | <p>4J24</p> <p><i>Estrogen Receptor in complex with proline-flanked LXXLL peptides</i></p> <ul style="list-style-type: none"> <li>• <b>PDB DOI:</b> <a href="https://doi.org/10.2210/pdb4J24/pdb">https://doi.org/10.2210/pdb4J24/pdb</a></li> <li>• <b>Classification:</b> <b>HORMONE RECEPTOR/PEPTIDE</b></li> <li>• <b>Organism(s):</b> <i>Homo sapiens</i></li> <li>• <b>Expression System:</b> <i>Escherichia coli</i></li> <li>• <b>Mutation(s):</b> No</li> <li>• <b>Deposited:</b> 2013-02-04 <b>Released:</b> 2013-03-13</li> <li>• <b>Deposition Author(s):</b> <a href="#">Fuchs, S.</a>, <a href="#">Nguyen, H.D.</a>, <a href="#">Phan, T.</a>, <a href="#">Burton, M.</a>, <a href="#">Nieto, L.</a>, <a href="#">de Vries-van Leeuwen, I.</a>, <a href="#">Schmidt, A.</a>, <a href="#">Goodarzifard, M.</a>, <a href="#">Agten, S.</a>, <a href="#">Rose, R.</a>, <a href="#">Ottmann, C.</a>, <a href="#">Milroy, L.G.</a>, <a href="#">Brunsvel, L.</a></li> </ul> <p><b>Experimental Data Snapshot</b></p> <ul style="list-style-type: none"> <li>• <b>Method:</b> X-RAY DIFFRACTION</li> <li>• <b>Resolution:</b> 2.10 Å</li> <li>• <b>R-Value Free:</b> 0.224</li> <li>• <b>R-Value Work:</b> 0.190</li> <li>• <b>R-Value Observed:</b> 0.192</li> </ul> |

|                 |                 |      |                                                                                     |                                                                                                                                                                                                                                                                                                                                                                                                                                                                                                                                                                                                                                                                                                                                                                                                                                                                                 |
|-----------------|-----------------|------|-------------------------------------------------------------------------------------|---------------------------------------------------------------------------------------------------------------------------------------------------------------------------------------------------------------------------------------------------------------------------------------------------------------------------------------------------------------------------------------------------------------------------------------------------------------------------------------------------------------------------------------------------------------------------------------------------------------------------------------------------------------------------------------------------------------------------------------------------------------------------------------------------------------------------------------------------------------------------------|
| Metallothionein | Target Protein  | 1MHU | 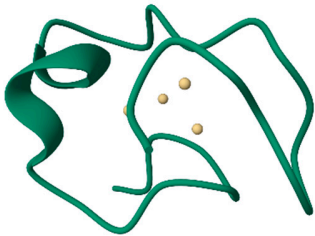   | <p>1MHU</p> <p><i>THE THREE-DIMENSIONAL STRUCTURE OF HUMAN [113CD7] METALLOTHIONEIN-2 IN SOLUTION DETERMINED BY NUCLEAR MAGNETIC RESONANCE SPECTROSCOPY</i></p> <ul style="list-style-type: none"> <li>• <b>PDB</b><br/>DOI: <a href="https://doi.org/10.2210/pdb1MHU/pdb">https://doi.org/10.2210/pdb1MHU/pdb</a></li> <li>• <b>BMRB:</b> 1154</li> <li>• <b>Classification:</b> <b>METALLOTHIONEIN</b></li> <li>• <b>Organism(s):</b> <u>Homo sapiens</u></li> <li>• <b>Mutation(s):</b> No</li> <li>• <b>Deposited:</b> 1990-05-14 <b>Released:</b> 1991-04-15</li> <li>• <b>Deposition Author(s):</b> <u>Braun, W., Messerle, B.A., Schaeffer, A., Vasak, M., Kaegi, J.H.R., Wuthrich, K.</u></li> </ul> <p><b>Experimental Data Snapshot</b></p> <ul style="list-style-type: none"> <li>• <b>Method:</b> SOLUTION NMR</li> <li>• <b>Conformers Submitted:</b> 1</li> </ul> |
|                 | Target Receptor | 2MHU |  | <p>2MHU</p> <p><i>THE THREE-DIMENSIONAL STRUCTURE OF HUMAN [113CD7] METALLOTHIONEIN-2 IN SOLUTION DETERMINED BY NUCLEAR MAGNETIC RESONANCE SPECTROSCOPY</i></p> <ul style="list-style-type: none"> <li>• <b>PDB</b><br/>DOI: <a href="https://doi.org/10.2210/pdb2MHU/pdb">https://doi.org/10.2210/pdb2MHU/pdb</a></li> <li>• <b>Classification:</b> <b>METALLOTHIONEIN</b></li> <li>• <b>Organism(s):</b> <u>Homo sapiens</u></li> <li>• <b>Mutation(s):</b> No</li> <li>• <b>Deposited:</b> 1990-05-14 <b>Released:</b> 1991-04-15</li> <li>• <b>Deposition Author(s):</b> <u>Braun, W., Messerle, B.A., Schaeffer, A., Vasak, M., Kaegi, J.H.R., Wuthrich, K.</u></li> </ul> <p><b>Experimental Data Snapshot</b></p> <ul style="list-style-type: none"> <li>• <b>Method:</b> SOLUTION NMR</li> <li>• <b>Conformers Submitted:</b> 1</li> </ul>                              |



|         |                |      |                                                                                     |                                                                                                                                                                                                                                                                                                                                                                                                                                                                                                                                                                                                                                                                                                                                                                                                                                                                                                                                                                                                                                                                                                                                                                                                                                                 |
|---------|----------------|------|-------------------------------------------------------------------------------------|-------------------------------------------------------------------------------------------------------------------------------------------------------------------------------------------------------------------------------------------------------------------------------------------------------------------------------------------------------------------------------------------------------------------------------------------------------------------------------------------------------------------------------------------------------------------------------------------------------------------------------------------------------------------------------------------------------------------------------------------------------------------------------------------------------------------------------------------------------------------------------------------------------------------------------------------------------------------------------------------------------------------------------------------------------------------------------------------------------------------------------------------------------------------------------------------------------------------------------------------------|
|         |                | 2F5H | 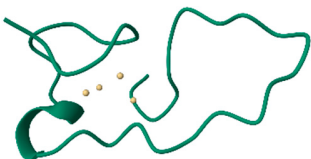   | <p>2F5H</p> <p><i>Solution structure of the alpha-domain of human Metallothionein-3</i></p> <ul style="list-style-type: none"> <li>• <b>PDB</b><br/>DOI: <a href="https://doi.org/10.2210/pdb2F5H/pdb">https://doi.org/10.2210/pdb2F5H/pdb</a></li> <li>• <b>Classification:</b> <b>METAL BINDING PROTEIN</b></li> <li>• <b>Organism(s):</b> <i>Homo sapiens</i></li> <li>• <b>Expression System:</b> <i>Escherichia coli</i> BL21</li> <li>• <b>Mutation(s):</b> No</li> <li>• <b>Deposited:</b> 2005-11-25 <b>Released:</b> 2006-05-30</li> <li>• <b>Deposition Author(s):</b> <a href="#">Wang, H.</a>, <a href="#">Zhang, Q.</a>, <a href="#">Cai, B.</a>, <a href="#">Li, H.Y.</a>, <a href="#">Sze, K.H.</a>, <a href="#">Huang, Z.X.</a>, <a href="#">Wu, H.M.</a>, <a href="#">Sun, H.Z.</a></li> </ul> <p><b>Experimental Data Snapshot</b></p> <ul style="list-style-type: none"> <li>• <b>Method:</b> SOLUTION NMR</li> <li>• <b>Conformers Calculated:</b> 30</li> <li>• <b>Conformers Submitted:</b> 10</li> <li>• <b>Selection Criteria:</b> best converged structures</li> </ul>                                                                                                                                                 |
| Keratin | Target Protein | 6EC0 |  | <p>6EC0</p> <p><i>Crystal structure of the wild-type heterocomplex between coil 1B domains of human intermediate filament proteins keratin 1 (KRT1) and keratin 10 (KRT10)</i></p> <ul style="list-style-type: none"> <li>• <b>PDB</b><br/>DOI: <a href="https://doi.org/10.2210/pdb6EC0/pdb">https://doi.org/10.2210/pdb6EC0/pdb</a></li> <li>• <b>Classification:</b> <b>PROTEIN FIBRIL</b></li> <li>• <b>Organism(s):</b> <i>Homo sapiens</i></li> <li>• <b>Expression System:</b> <i>Escherichia coli</i> BL21(DE3)</li> <li>• <b>Mutation(s):</b> No</li> <li>• <b>Deposited:</b> 2018-08-07 <b>Released:</b> 2019-05-15</li> <li>• <b>Deposition Author(s):</b> <a href="#">Eldirany, S.A.</a>, <a href="#">Lomakin, I.B.</a>, <a href="#">Bunick, C.G.</a></li> <li>• <b>Funding Organization(s):</b> National Institutes of Health/National Institute of Arthritis and Musculoskeletal and Skin Diseases (NIH/NIAMS), Other private</li> </ul> <p><b>Experimental Data Snapshot</b></p> <ul style="list-style-type: none"> <li>• <b>Method:</b> X-RAY DIFFRACTION</li> <li>• <b>Resolution:</b> 2.98 Å</li> <li>• <b>R-Value Free:</b> 0.300</li> <li>• <b>R-Value Work:</b> 0.281</li> <li>• <b>R-Value Observed:</b> 0.282</li> </ul> |

|                          |                    |      |                                                                                     |                                                                                                                                                                                                                                                                                                                                                                                                                                                                                                                                                                                                                                                                                                                                                                                                                                                                                                                                                                                                                                                                     |
|--------------------------|--------------------|------|-------------------------------------------------------------------------------------|---------------------------------------------------------------------------------------------------------------------------------------------------------------------------------------------------------------------------------------------------------------------------------------------------------------------------------------------------------------------------------------------------------------------------------------------------------------------------------------------------------------------------------------------------------------------------------------------------------------------------------------------------------------------------------------------------------------------------------------------------------------------------------------------------------------------------------------------------------------------------------------------------------------------------------------------------------------------------------------------------------------------------------------------------------------------|
|                          | Target<br>Receptor | 4ZRY | 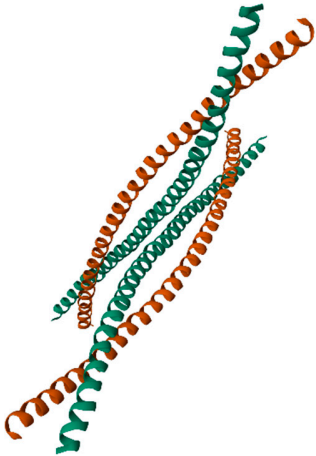   | <p>4ZRY</p> <p><i>Crystal structure of the heterocomplex between coil 2B domains of human intermediate filament proteins keratin 1 (KRT1) and keratin 10 (KRT10)</i></p> <ul style="list-style-type: none"> <li>• <b>PDB</b><br/>DOI: <a href="https://doi.org/10.2210/pdb4ZRY/pdb">https://doi.org/10.2210/pdb4ZRY/pdb</a></li> <li>• <b>Classification:</b> <u>PROTEIN FIBRIL</u></li> <li>• <b>Organism(s):</b> <u>Homo sapiens</u></li> <li>• <b>Expression System:</b> <u>Escherichia coli BL21(DE3)</u></li> <li>• <b>Mutation(s):</b> No</li> <li>• <b>Deposited:</b> 2015-05-12 <b>Released:</b> 2016-05-18</li> <li>• <b>Deposition Author(s):</b> <u>Bunick, C.G., Steitz, T.A.</u></li> <li>• <b>Funding Organization(s):</b> Dermatology Foundation</li> </ul> <p><b>Experimental Data Snapshot</b></p> <ul style="list-style-type: none"> <li>• <b>Method:</b> X-RAY DIFFRACTION</li> <li>• <b>Resolution:</b> 3.30 Å</li> <li>• <b>R-Value Free:</b> 0.277</li> <li>• <b>R-Value Work:</b> 0.273</li> <li>• <b>R-Value Observed:</b> 0.273</li> </ul> |
| Protein kinase<br>enzyme | Target<br>Protein  | 1P4F |  | <p>1P4F</p> <p><i>DEATH ASSOCIATED PROTEIN KINASE CATALYTIC DOMAIN WITH BOUND INHIBITOR FRAGMENT</i></p> <ul style="list-style-type: none"> <li>• <b>PDB DOI:</b> <a href="https://doi.org/10.2210/pdb1P4F/pdb">https://doi.org/10.2210/pdb1P4F/pdb</a></li> <li>• <b>Classification:</b> <u>TRANSFERASE</u></li> <li>• <b>Organism(s):</b> <u>Homo sapiens</u></li> <li>• <b>Expression System:</b> <u>Escherichia coli</u></li> <li>• <b>Mutation(s):</b> No</li> <li>• <b>Deposited:</b> 2003-04-23 <b>Released:</b> 2004-09-28</li> <li>• <b>Deposition Author(s):</b> <u>Velentza, A.V., Wainwright, M.S., Zasadzki, M., Mirzoeva, S., Haiech, J., Focia, P.J., Egli, M., Watterson, D.M.</u></li> </ul> <p><b>Experimental Data Snapshot</b></p> <ul style="list-style-type: none"> <li>• <b>Method:</b> X-RAY DIFFRACTION</li> <li>• <b>Resolution:</b> 1.90 Å</li> <li>• <b>R-Value Free:</b> 0.233</li> <li>• <b>R-Value Work:</b> 0.185</li> <li>• <b>R-Value Observed:</b> 0.186</li> </ul>                                                              |

|  |                 |      |                                                                                     |                                                                                                                                                                                                                                                                                                                                                                                                                                                                                                                                                                                                                                                                                                                                                                                                                                                                                                                                                            |
|--|-----------------|------|-------------------------------------------------------------------------------------|------------------------------------------------------------------------------------------------------------------------------------------------------------------------------------------------------------------------------------------------------------------------------------------------------------------------------------------------------------------------------------------------------------------------------------------------------------------------------------------------------------------------------------------------------------------------------------------------------------------------------------------------------------------------------------------------------------------------------------------------------------------------------------------------------------------------------------------------------------------------------------------------------------------------------------------------------------|
|  |                 | 5IKP | 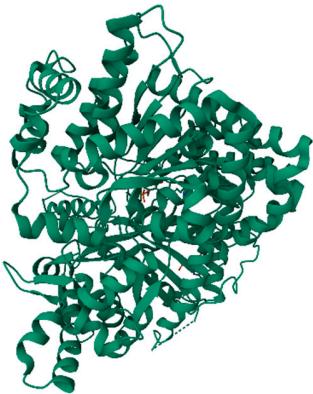   | <p>5IKP</p> <p><i>Crystal structure of human brain glycogen phosphorylase bound to AMP</i></p> <ul style="list-style-type: none"> <li>• <b>PDB DOI:</b> <a href="https://doi.org/10.2210/pdb5IKP/pdb">https://doi.org/10.2210/pdb5IKP/pdb</a></li> <li>• <b>Classification:</b> <b>TRANSFERASE</b></li> <li>• <b>Organism(s):</b> <u>Homo sapiens</u></li> <li>• <b>Expression System:</b> <u>Escherichia coli</u></li> <li>• <b>Mutation(s):</b> No</li> <li>• <b>Deposited:</b> 2016-03-03 <b>Released:</b> 2016-07-20</li> <li>• <b>Deposition Author(s):</b> <u>Mathieu, C., Li de la Sierra-Gallay, I., Xu, X., Haouz, A., Rodrigues-Lima, F.</u></li> </ul> <p><b>Experimental Data Snapshot</b></p> <ul style="list-style-type: none"> <li>• <b>Method:</b> X-RAY DIFFRACTION</li> <li>• <b>Resolution:</b> 3.40 Å</li> <li>• <b>R-Value Free:</b> 0.295</li> <li>• <b>R-Value Work:</b> 0.202</li> <li>• <b>R-Value Observed:</b> 0.207</li> </ul> |
|  | Target Receptor | 1LHR |  | <p>1LHR</p> <p><i>Crystal Structure of Pyridoxal Kinase complexed with ATP</i></p> <ul style="list-style-type: none"> <li>• <b>PDB DOI:</b> <a href="https://doi.org/10.2210/pdb1LHR/pdb">https://doi.org/10.2210/pdb1LHR/pdb</a></li> <li>• <b>Classification:</b> <b>TRANSFERASE</b></li> <li>• <b>Organism(s):</b> <u>Ovis aries</u></li> <li>• <b>Mutation(s):</b> No</li> <li>• <b>Deposited:</b> 2002-04-17 <b>Released:</b> 2003-02-11</li> <li>• <b>Deposition Author(s):</b> <u>Liang, D.C., Jiang, T., Li, M.H.</u></li> </ul> <p><b>Experimental Data Snapshot</b></p> <ul style="list-style-type: none"> <li>• <b>Method:</b> X-RAY DIFFRACTION</li> <li>• <b>Resolution:</b> 2.60 Å</li> <li>• <b>R-Value Free:</b> 0.222</li> <li>• <b>R-Value Work:</b> 0.193</li> <li>• <b>R-Value Observed:</b> 0.198</li> </ul>                                                                                                                          |

|              |                |      |                                                                                     |                                                                                                                                                                                                                                                                                                                                                                                                                                                                                                                                                                                                                                                                                                                                                                                                                                                                                                                                                                                                              |
|--------------|----------------|------|-------------------------------------------------------------------------------------|--------------------------------------------------------------------------------------------------------------------------------------------------------------------------------------------------------------------------------------------------------------------------------------------------------------------------------------------------------------------------------------------------------------------------------------------------------------------------------------------------------------------------------------------------------------------------------------------------------------------------------------------------------------------------------------------------------------------------------------------------------------------------------------------------------------------------------------------------------------------------------------------------------------------------------------------------------------------------------------------------------------|
|              |                | 6E0R |    | <p>6E0R</p> <p><i>hALK in complex with compound 7 N-((1S)-1-(5-fluoropyridin-2-yl)ethyl)-1-(5-methyl-1H-pyrazol-3-yl)-3-(oxetan-3-ylsulfonyl)-1H-pyrrolo[2,3-b]pyridin-6-amine</i></p> <ul style="list-style-type: none"> <li>• <b>PDB</b><br/>DOI: <a href="https://doi.org/10.2210/pdb6E0R/pdb">https://doi.org/10.2210/pdb6E0R/pdb</a></li> <li>• <b>Classification:</b> <b>PROTEIN BINDING</b></li> <li>• <b>Organism(s):</b> <u>Homo sapiens</u></li> <li>• <b>Expression System:</b> <u>unidentified baculovirus</u></li> <li>• <b>Mutation(s):</b> No</li> <li>• <b>Deposited:</b> 2018-07-06 <b>Released:</b> 2019-05-01</li> <li>• <b>Deposition Author(s):</b> <u>Lane, W., Saikatendu, K.</u></li> </ul> <p><b>Experimental Data Snapshot</b></p> <ul style="list-style-type: none"> <li>• <b>Method:</b> X-RAY DIFFRACTION</li> <li>• <b>Resolution:</b> 2.30 Å</li> <li>• <b>R-Value Free:</b> 0.296</li> <li>• <b>R-Value Work:</b> 0.237</li> <li>• <b>R-Value Observed:</b> 0.241</li> </ul> |
| Beta Amyloid | Target Protein | 5TXJ |  | <p>5TXJ</p> <p><i>Polymorphic form 1 of amyloid-beta derived peptide - IFAE DV</i></p> <ul style="list-style-type: none"> <li>• <b>PDB</b><br/>DOI: <a href="https://doi.org/10.2210/pdb5TXJ/pdb">https://doi.org/10.2210/pdb5TXJ/pdb</a></li> <li>• <b>Classification:</b> <b>DE NOVO PROTEIN</b></li> <li>• <b>Organism(s):</b> <u>Homo sapiens</u></li> <li>• <b>Mutation(s):</b> No</li> <li>• <b>Deposited:</b> 2016-11-16 <b>Released:</b> 2017-11-15</li> <li>• <b>Deposition Author(s):</b> <u>Sangwan, S., Sawaya, M.R., Eisenberg, D.</u></li> </ul> <p><b>Experimental Data Snapshot</b></p> <ul style="list-style-type: none"> <li>• <b>Method:</b> X-RAY DIFFRACTION</li> <li>• <b>Resolution:</b> 1.13 Å</li> <li>• <b>R-Value Free:</b> 0.157</li> <li>• <b>R-Value Work:</b> 0.145</li> <li>• <b>R-Value Observed:</b> 0.146</li> </ul>                                                                                                                                                      |

|                 |  |      |                                                                                     |                                                                                                                                                                                                                                                                                                                                                                                                                                                                                                                                                                                                                                                                                                                                                                                                                                                                                                                                                                                                |
|-----------------|--|------|-------------------------------------------------------------------------------------|------------------------------------------------------------------------------------------------------------------------------------------------------------------------------------------------------------------------------------------------------------------------------------------------------------------------------------------------------------------------------------------------------------------------------------------------------------------------------------------------------------------------------------------------------------------------------------------------------------------------------------------------------------------------------------------------------------------------------------------------------------------------------------------------------------------------------------------------------------------------------------------------------------------------------------------------------------------------------------------------|
|                 |  | 3T4G | 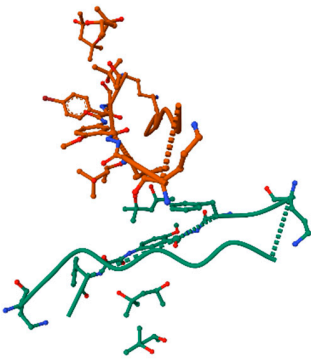   | <p>3T4G</p> <p><i>AIIGLMV segment from Alzheimer's Amyloid-Beta displayed on 54-membered macrocycle scaffold</i></p> <ul style="list-style-type: none"> <li>• <b>PDB</b><br/>DOI: <a href="https://doi.org/10.2210/pdb3T4G/pdb">https://doi.org/10.2210/pdb3T4G/pdb</a></li> <li>• <b>Classification:</b> <b>UNKNOWN FUNCTION</b></li> <li>• <b>Mutation(s):</b> No</li> <li>• <b>Deposited:</b> 2011-07-26 <b>Released:</b> 2012-10-31</li> <li>• <b>Deposition Author(s):</b> <a href="#">Zhao, M.</a>, <a href="#">Liu, C.</a>, <a href="#">Cheng, P.N.</a>, <a href="#">Eisenberg, D.</a>, <a href="#">Nowick, J.S.</a></li> </ul> <p><b>Experimental Data Snapshot</b></p> <ul style="list-style-type: none"> <li>• <b>Method:</b> X-RAY DIFFRACTION</li> <li>• <b>Resolution:</b> 1.70 Å</li> <li>• <b>R-Value Free:</b> 0.274</li> <li>• <b>R-Value Work:</b> 0.236</li> <li>• <b>R-Value Observed:</b> 0.240</li> </ul>                                                                |
| Target Receptor |  | 3Q7G |  | <p>3Q7G</p> <p><i>Crystal Structure of E2 domain of Human Amyloid Precursor-Like Protein 1 in complex with SOS (sucrose octasulfate)</i></p> <ul style="list-style-type: none"> <li>• <b>PDB</b><br/>DOI: <a href="https://doi.org/10.2210/pdb3Q7G/pdb">https://doi.org/10.2210/pdb3Q7G/pdb</a></li> <li>• <b>Classification:</b> <b>SIGNALING PROTEIN</b></li> <li>• <b>Organism(s):</b> <a href="#">Homo sapiens</a></li> <li>• <b>Expression System:</b> <a href="#">Escherichia coli</a></li> <li>• <b>Mutation(s):</b> No</li> <li>• <b>Deposited:</b> 2011-01-04 <b>Released:</b> 2011-06-22</li> <li>• <b>Deposition Author(s):</b> <a href="#">Xue, Y.</a>, <a href="#">Ha, Y.</a></li> </ul> <p><b>Experimental Data Snapshot</b></p> <ul style="list-style-type: none"> <li>• <b>Method:</b> X-RAY DIFFRACTION</li> <li>• <b>Resolution:</b> 2.30 Å</li> <li>• <b>R-Value Free:</b> 0.261</li> <li>• <b>R-Value Work:</b> 0.217</li> <li>• <b>R-Value Observed:</b> 0.222</li> </ul> |

|        |                    |          |                                                                                     |                                                                                                                                                                                                                                                                                                                                                                                                                                                                                                                                                                                                                                                                                                                                                                                                                                                                                                                                                                                                                                                                                               |
|--------|--------------------|----------|-------------------------------------------------------------------------------------|-----------------------------------------------------------------------------------------------------------------------------------------------------------------------------------------------------------------------------------------------------------------------------------------------------------------------------------------------------------------------------------------------------------------------------------------------------------------------------------------------------------------------------------------------------------------------------------------------------------------------------------------------------------------------------------------------------------------------------------------------------------------------------------------------------------------------------------------------------------------------------------------------------------------------------------------------------------------------------------------------------------------------------------------------------------------------------------------------|
| ATPase | Target<br>Receptor | 6WL<br>W | 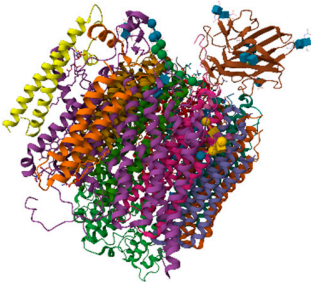   | <p>6WLW</p> <p><i>The Vo region of human V-ATPase in state 1 (focused refinement)</i></p> <ul style="list-style-type: none"> <li>• <b>PDB</b><br/>DOI: <a href="https://doi.org/10.2210/pdb6WLW/pdb">https://doi.org/10.2210/pdb6WLW/pdb</a></li> <li>• <b>EM Map EMD-21844:</b> <a href="#">EMDB</a> <a href="#">EMDataResource</a></li> <li>• <b>Classification:</b> <b>MEMBRANE PROTEIN</b></li> <li>• <b>Organism(s):</b> <a href="#">Homo sapiens</a></li> <li>• <b>Mutation(s):</b> No</li> <li>• <b>Membrane Protein:</b> <a href="#">Yes</a></li> <li>• <b>Deposited:</b> 2020-04-20 <b>Released:</b> 2020-11-11</li> <li>• <b>Deposition Author(s):</b> <a href="#">Wang, L.</a>, <a href="#">Wu, H.</a>, <a href="#">Fu, T.-M.</a></li> </ul> <p><b>Experimental Data Snapshot</b></p> <ul style="list-style-type: none"> <li>• <b>Method:</b> ELECTRON MICROSCOPY</li> <li>• <b>Resolution:</b> 3.00 Å</li> <li>• <b>Aggregation State:</b> PARTICLE</li> <li>• <b>Reconstruction Method:</b> SINGLE PARTICLE</li> </ul>                                                           |
|        |                    | 6WM<br>3 |  | <p>6WM3</p> <p><i>Human V-ATPase in state 2 with SidK and ADP</i></p> <ul style="list-style-type: none"> <li>• <b>PDB</b><br/>DOI: <a href="https://doi.org/10.2210/pdb6WM3/pdb">https://doi.org/10.2210/pdb6WM3/pdb</a></li> <li>• <b>EM Map EMD-21848:</b> <a href="#">EMDB</a> <a href="#">EMDataResource</a></li> <li>• <b>Classification:</b> <b>MEMBRANE PROTEIN</b></li> <li>• <b>Organism(s):</b> <a href="#">Homo sapiens</a>, <a href="#">Legionella pneumophila subsp. pneumophila str. Philadelphia 1</a></li> <li>• <b>Mutation(s):</b> No</li> <li>• <b>Membrane Protein:</b> <a href="#">Yes</a></li> <li>• <b>Deposited:</b> 2020-04-20 <b>Released:</b> 2020-11-11</li> <li>• <b>Deposition Author(s):</b> <a href="#">Wang, L.</a>, <a href="#">Wu, H.</a>, <a href="#">Fu, T.M.</a></li> </ul> <p><b>Experimental Data Snapshot</b></p> <ul style="list-style-type: none"> <li>• <b>Method:</b> ELECTRON MICROSCOPY</li> <li>• <b>Resolution:</b> 3.40 Å</li> <li>• <b>Aggregation State:</b> PARTICLE</li> <li>• <b>Reconstruction Method:</b> SINGLE PARTICLE</li> </ul> |

|         |                |      |                                                                                     |                                                                                                                                                                                                                                                                                                                                                                                                                                                                                                                                                                                                                                                                                                                                                                                                                                                                                                                                                                                                                                |
|---------|----------------|------|-------------------------------------------------------------------------------------|--------------------------------------------------------------------------------------------------------------------------------------------------------------------------------------------------------------------------------------------------------------------------------------------------------------------------------------------------------------------------------------------------------------------------------------------------------------------------------------------------------------------------------------------------------------------------------------------------------------------------------------------------------------------------------------------------------------------------------------------------------------------------------------------------------------------------------------------------------------------------------------------------------------------------------------------------------------------------------------------------------------------------------|
| Albumin | Target Protein | 5UJB | 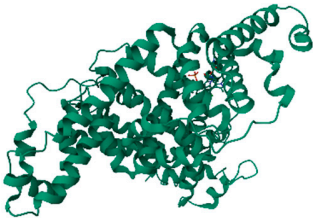   | <p>5UJB</p> <p><i>Structure of a Mcl-1 Inhibitor Binding to Site 3 of Human Serum Albumin</i></p> <ul style="list-style-type: none"> <li>• <b>PDB</b><br/>DOI: <a href="https://doi.org/10.2210/pdb5UJB/pdb">https://doi.org/10.2210/pdb5UJB/pdb</a></li> <li>• <b>Classification:</b> <b>TRANSPORT PROTEIN</b></li> <li>• <b>Organism(s):</b> <u>Homo sapiens</u></li> <li>• <b>Expression System:</b> <u>Homo sapiens</u></li> <li>• <b>Mutation(s):</b> No</li> <li>• <b>Deposited:</b> 2017-01-17 <b>Released:</b> 2017-05-03</li> <li>• <b>Deposition Author(s):</b> <u>Zhao, B.</u></li> <li>• <b>Funding Organization(s):</b> National Institutes of Health/National Cancer Institute (NIH/NCI)</li> </ul> <p><b>Experimental Data Snapshot</b></p> <ul style="list-style-type: none"> <li>• <b>Method:</b> X-RAY DIFFRACTION</li> <li>• <b>Resolution:</b> 2.70 Å</li> <li>• <b>R-Value Free:</b> 0.215</li> <li>• <b>R-Value Work:</b> 0.174</li> <li>• <b>R-Value Observed:</b> 0.177</li> </ul>                     |
|         |                | 6M5D |  | <p>6M5D</p> <p><i>Human serum albumin (apo form)</i></p> <ul style="list-style-type: none"> <li>• <b>PDB</b><br/>DOI: <a href="https://doi.org/10.2210/pdb6M5D/pdb">https://doi.org/10.2210/pdb6M5D/pdb</a></li> <li>• <b>Classification:</b> <b>PEPTIDE BINDING PROTEIN</b></li> <li>• <b>Organism(s):</b> <u>Homo sapiens</u></li> <li>• <b>Expression System:</b> <u>Homo sapiens</u></li> <li>• <b>Mutation(s):</b> No</li> <li>• <b>Deposited:</b> 2020-03-10 <b>Released:</b> 2020-11-18</li> <li>• <b>Deposition Author(s):</b> <u>Ito, S., Senoo, A., Nagatoishi, S., Yamamoto, M., Tsumoto, K., Wakui, N.</u></li> <li>• <b>Funding Organization(s):</b> Japan Agency for Medical Research and Development (AMED)</li> </ul> <p><b>Experimental Data Snapshot</b></p> <ul style="list-style-type: none"> <li>• <b>Method:</b> X-RAY DIFFRACTION</li> <li>• <b>Resolution:</b> 2.60 Å</li> <li>• <b>R-Value Free:</b> 0.264</li> <li>• <b>R-Value Work:</b> 0.230</li> <li>• <b>R-Value Observed:</b> 0.232</li> </ul> |

|  |                    |      |                                                                                     |                                                                                                                                                                                                                                                                                                                                                                                                                                                                                                                                                                                                                                                                                                                                                                                                                                                                                                                                                               |
|--|--------------------|------|-------------------------------------------------------------------------------------|---------------------------------------------------------------------------------------------------------------------------------------------------------------------------------------------------------------------------------------------------------------------------------------------------------------------------------------------------------------------------------------------------------------------------------------------------------------------------------------------------------------------------------------------------------------------------------------------------------------------------------------------------------------------------------------------------------------------------------------------------------------------------------------------------------------------------------------------------------------------------------------------------------------------------------------------------------------|
|  | Target<br>Receptor | 6HSC | 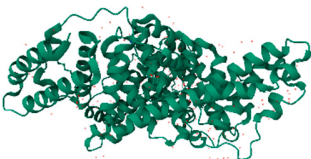   | <p>6HSC</p> <p><i>Structure of Human Serum Albumin in complex with Aristolochic Acid at 1.9 Å resolution</i></p> <ul style="list-style-type: none"> <li>• <b>PDB</b><br/>DOI: <a href="https://doi.org/10.2210/pdb6HSC/pdb">https://doi.org/10.2210/pdb6HSC/pdb</a></li> <li>• <b>Classification:</b> <b>TRANSPORT PROTEIN</b></li> <li>• <b>Organism(s):</b> <u>Homo sapiens</u></li> <li>• <b>Expression System:</b> <u>Homo sapiens</u></li> <li>• <b>Mutation(s):</b> No</li> <li>• <b>Deposited:</b> 2018-09-29 <b>Released:</b> 2019-10-23</li> <li>• <b>Deposition Author(s):</b> <u>Pomyalov, S., Sidorenko, V.S., Grollman, A.P., Shoham, G.</u></li> </ul> <p><b>Experimental Data Snapshot</b></p> <ul style="list-style-type: none"> <li>• <b>Method:</b> X-RAY DIFFRACTION</li> <li>• <b>Resolution:</b> 1.90 Å</li> <li>• <b>R-Value Free:</b> 0.286</li> <li>• <b>R-Value Work:</b> 0.238</li> <li>• <b>R-Value Observed:</b> 0.240</li> </ul> |
|  |                    | 2ESG |  | <p>2ESG</p> <p><i>Solution structure of the complex between immunoglobulin IgA1 and human serum albumin</i></p> <ul style="list-style-type: none"> <li>• <b>PDB</b><br/>DOI: <a href="https://doi.org/10.2210/pdb2ESG/pdb">https://doi.org/10.2210/pdb2ESG/pdb</a></li> <li>• <b>Classification:</b> <b>IMMUNE SYSTEM/TRANSPORT PROTEIN</b></li> <li>• <b>Organism(s):</b> <u>Homo sapiens</u></li> <li>• <b>Expression System:</b> <u>Escherichia coli</u></li> <li>• <b>Mutation(s):</b> No</li> <li>• <b>Deposited:</b> 2005-10-26 <b>Released:</b> 2006-01-31</li> <li>• <b>Deposition Author(s):</b> <u>Almogren, A., Furtado, P.B., Sun, Z., Perkins, S.J., Kerr, M.A.</u></li> </ul> <p><b>Experimental Data Snapshot</b></p> <ul style="list-style-type: none"> <li>• <b>Method:</b> SOLUTION SCATTERING</li> </ul>                                                                                                                                   |



|                          |                |      |                                                                                     |                                                                                                                                                                                                                                                                                                                                                                                                                                                                                                                                                                                                                                                                                                                                                                                                                                                                                                                                                              |
|--------------------------|----------------|------|-------------------------------------------------------------------------------------|--------------------------------------------------------------------------------------------------------------------------------------------------------------------------------------------------------------------------------------------------------------------------------------------------------------------------------------------------------------------------------------------------------------------------------------------------------------------------------------------------------------------------------------------------------------------------------------------------------------------------------------------------------------------------------------------------------------------------------------------------------------------------------------------------------------------------------------------------------------------------------------------------------------------------------------------------------------|
|                          |                | 6YG9 | 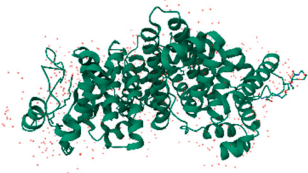   | <p>6YG9</p> <p><i>CRYSTAL STRUCTURE OF HUMAN SERUM ALBUMIN (HSA) IN COMPLEX WITH GN-07.</i></p> <ul style="list-style-type: none"> <li>• <b>PDB</b><br/>DOI: <a href="https://doi.org/10.2210/pdb6YG9/pdb">https://doi.org/10.2210/pdb6YG9/pdb</a></li> <li>• <b>Classification:</b> <u>TRANSPORT PROTEIN</u></li> <li>• <b>Organism(s):</b> <u>Homo sapiens</u></li> <li>• <b>Mutation(s):</b> No</li> <li>• <b>Deposited:</b> 2020-03-27 <b>Released:</b> 2021-01-13</li> <li>• <b>Deposition Author(s):</b> <u>Schreuder, H.A., Liesum, A.</u></li> </ul> <p><b>Experimental Data Snapshot</b></p> <ul style="list-style-type: none"> <li>• <b>Method:</b> X-RAY DIFFRACTION</li> <li>• <b>Resolution:</b> 1.89 Å</li> <li>• <b>R-Value Free:</b> 0.313</li> <li>• <b>R-Value Work:</b> 0.239</li> <li>• <b>R-Value Observed:</b> 0.243</li> </ul>                                                                                                        |
| Mono amino oxidase (MAO) | Target Protein | 2BK3 |  | <p>2BK3</p> <p><i>Human Monoamine Oxidase B in complex with Farnesol</i></p> <ul style="list-style-type: none"> <li>• <b>PDB</b><br/>DOI: <a href="https://doi.org/10.2210/pdb2BK3/pdb">https://doi.org/10.2210/pdb2BK3/pdb</a></li> <li>• <b>Classification:</b> <u>OXIDOREDUCTASE</u></li> <li>• <b>Organism(s):</b> <u>Homo sapiens</u></li> <li>• <b>Expression System:</b> <u>Komagataella pastoris</u></li> <li>• <b>Mutation(s):</b> No</li> <li>• <b>Membrane Protein:</b> <u>Yes</u></li> <li>• <b>Deposited:</b> 2005-02-10 <b>Released:</b> 2005-02-14</li> <li>• <b>Deposition Author(s):</b> <u>Binda, C., Edmondson, D.E., Mattevi, A.</u></li> </ul> <p><b>Experimental Data Snapshot</b></p> <ul style="list-style-type: none"> <li>• <b>Method:</b> X-RAY DIFFRACTION</li> <li>• <b>Resolution:</b> 1.80 Å</li> <li>• <b>R-Value Free:</b> 0.249</li> <li>• <b>R-Value Work:</b> 0.225</li> <li>• <b>R-Value Observed:</b> 0.226</li> </ul> |

|  |  |      |                                                                                     |                                                                                                                                                                                                                                                                                                                                                                                                                                                                                                                                                                                                                                                                                                                                                                                                                                                                                                                                                                                                                                                                                                                                |
|--|--|------|-------------------------------------------------------------------------------------|--------------------------------------------------------------------------------------------------------------------------------------------------------------------------------------------------------------------------------------------------------------------------------------------------------------------------------------------------------------------------------------------------------------------------------------------------------------------------------------------------------------------------------------------------------------------------------------------------------------------------------------------------------------------------------------------------------------------------------------------------------------------------------------------------------------------------------------------------------------------------------------------------------------------------------------------------------------------------------------------------------------------------------------------------------------------------------------------------------------------------------|
|  |  | 2BXS |    | <p>2BXS</p> <p><i>Human Monoamine Oxidase A in complex with Clorgyline, Crystal Form B</i></p> <ul style="list-style-type: none"> <li>• <b>PDB</b><br/>DOI: <a href="https://doi.org/10.2210/pdb2BXS/pdb">https://doi.org/10.2210/pdb2BXS/pdb</a></li> <li>• <b>Classification:</b> <b>OXIDOREDUCTASE</b></li> <li>• <b>Organism(s):</b> <u>Homo sapiens</u></li> <li>• <b>Expression System:</b> <u>Komagataella pastoris</u></li> <li>• <b>Mutation(s):</b> No</li> <li>• <b>Membrane Protein:</b> <u>Yes</u></li> <li>• <b>Deposited:</b> 2005-07-27 <b>Released:</b> 2005-08-09</li> <li>• <b>Deposition Author(s):</b> <u>De Colibus, L., Binda, C., Edmondson, D.E., Mattevi, A.</u></li> </ul> <p><b>Experimental Data Snapshot</b></p> <ul style="list-style-type: none"> <li>• <b>Method:</b> X-RAY DIFFRACTION</li> <li>• <b>Resolution:</b> 3.15 Å</li> <li>• <b>R-Value Free:</b> 0.330</li> <li>• <b>R-Value Work:</b> 0.268</li> <li>• <b>R-Value Observed:</b> 0.271</li> </ul>                                                                                                                                 |
|  |  | 7DJU |  | <p>7DJU</p> <p><i>NMR solution structure of the 1:1 complex of a platinum(II) compound bound to 5'-end of Myc1234 G-quadruplex reveals the mechanism of conformational switch and dynamic binding of G-quadruplex</i></p> <ul style="list-style-type: none"> <li>• <b>PDB</b><br/>DOI: <a href="https://doi.org/10.2210/pdb7DJU/pdb">https://doi.org/10.2210/pdb7DJU/pdb</a></li> <li>• <b>NDB:</b> <u>7DJU</u></li> <li>• <b>Classification:</b> <b>DNA</b></li> <li>• <b>Organism(s):</b> <u>Homo sapiens</u></li> <li>• <b>Mutation(s):</b> No</li> <li>• <b>Deposited:</b> 2020-11-22 <b>Released:</b> 2022-01-12</li> <li>• <b>Deposition Author(s):</b> <u>Liu, W., Mao, Z.W.</u></li> <li>• <b>Funding Organization(s):</b> National Natural Science Foundation of China (NSFC), Ministry of Education (MoE, China)</li> </ul> <p><b>Experimental Data Snapshot</b></p> <ul style="list-style-type: none"> <li>• <b>Method:</b> SOLUTION NMR</li> <li>• <b>Conformers Calculated:</b> 100</li> <li>• <b>Conformers Submitted:</b> 20</li> <li>• <b>Selection Criteria:</b> structures with the lowest energy</li> </ul> |

|  |                    |      |                                                                                     |                                                                                                                                                                                                                                                                                                                                                                                                                                                                                                                                                                                                                                                                                                                                                                                                                                                                                                                                                                                                                                                                                                                                 |
|--|--------------------|------|-------------------------------------------------------------------------------------|---------------------------------------------------------------------------------------------------------------------------------------------------------------------------------------------------------------------------------------------------------------------------------------------------------------------------------------------------------------------------------------------------------------------------------------------------------------------------------------------------------------------------------------------------------------------------------------------------------------------------------------------------------------------------------------------------------------------------------------------------------------------------------------------------------------------------------------------------------------------------------------------------------------------------------------------------------------------------------------------------------------------------------------------------------------------------------------------------------------------------------|
|  | Target<br>Receptor | 7EL7 | 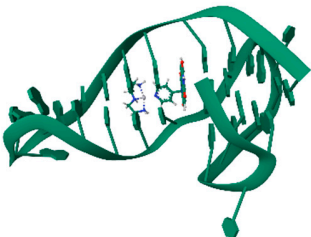   | <p>7EL7</p> <p><i>NMR solution structure of the 1:1 complex of a quadruplex-duplex hybrid MYT1L and a platinum(II) ligand L1Pt(dien)</i></p> <ul style="list-style-type: none"> <li>• <b>PDB DOI:</b> <a href="https://doi.org/10.2210/pdb7EL7/pdb">https://doi.org/10.2210/pdb7EL7/pdb</a></li> <li>• <b>NDB:</b> <a href="#">7EL7</a></li> <li>• <b>Classification:</b> <a href="#">DNA</a></li> <li>• <b>Organism(s):</b> <a href="#">Homo sapiens</a></li> <li>• <b>Mutation(s):</b> No</li> <li>• <b>Deposited:</b> 2021-04-08 <b>Released:</b> 2021-12-15</li> <li>• <b>Deposition Author(s):</b> <a href="#">Liu, L.-Y.</a>, <a href="#">Liu, W.</a>, <a href="#">Mao, Z.-W.</a></li> <li>• <b>Funding Organization(s):</b> National Science Foundation (NSF, China)</li> </ul> <p><b>Experimental Data Snapshot</b></p> <ul style="list-style-type: none"> <li>• <b>Method:</b> SOLUTION NMR</li> <li>• <b>Conformers Calculated:</b> 100</li> <li>• <b>Conformers Submitted:</b> 15</li> <li>• <b>Selection Criteria:</b> structures with the lowest energy</li> </ul>                                                 |
|  |                    | 2VRM |  | <p>2VRM</p> <p><i>Structure of human MAO B in complex with phenylethylhydrazine</i></p> <ul style="list-style-type: none"> <li>• <b>PDB DOI:</b> <a href="https://doi.org/10.2210/pdb2VRM/pdb">https://doi.org/10.2210/pdb2VRM/pdb</a></li> <li>• <b>Classification:</b> <a href="#">OXIDOREDUCTASE</a></li> <li>• <b>Organism(s):</b> <a href="#">Homo sapiens</a></li> <li>• <b>Expression System:</b> <a href="#">Komagataella pastoris</a></li> <li>• <b>Mutation(s):</b> No</li> <li>• <b>Membrane Protein:</b> <a href="#">Yes</a></li> <li>• <b>Deposited:</b> 2008-04-09 <b>Released:</b> 2008-04-22</li> <li>• <b>Deposition Author(s):</b> <a href="#">Binda, C.</a>, <a href="#">Wang, J.</a>, <a href="#">Li, M.</a>, <a href="#">Hubalek, F.</a>, <a href="#">Mattevi, A.</a>, <a href="#">Edmondson, D.E.</a></li> </ul> <p><b>Experimental Data Snapshot</b></p> <ul style="list-style-type: none"> <li>• <b>Method:</b> X-RAY DIFFRACTION</li> <li>• <b>Resolution:</b> 2.30 Å</li> <li>• <b>R-Value Free:</b> 0.246</li> <li>• <b>R-Value Work:</b> 0.200</li> <li>• <b>R-Value Observed:</b> 0.201</li> </ul> |

|            |                |      |                                                                                     |                                                                                                                                                                                                                                                                                                                                                                                                                                                                                                                                                                                                                                                                                                                                                                                                                                                                                                                                                                                                                                                                                                   |
|------------|----------------|------|-------------------------------------------------------------------------------------|---------------------------------------------------------------------------------------------------------------------------------------------------------------------------------------------------------------------------------------------------------------------------------------------------------------------------------------------------------------------------------------------------------------------------------------------------------------------------------------------------------------------------------------------------------------------------------------------------------------------------------------------------------------------------------------------------------------------------------------------------------------------------------------------------------------------------------------------------------------------------------------------------------------------------------------------------------------------------------------------------------------------------------------------------------------------------------------------------|
| adrenaline | Target Protein | 2HKK | 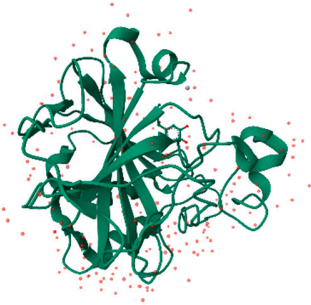   | <p>2HKK</p> <p><i>Carbonic anhydrase activators: Solution and X-ray crystallography for the interaction of adrenaline with various carbonic anhydrase isoforms</i></p> <ul style="list-style-type: none"> <li>• <b>PDB</b><br/>DOI: <a href="https://doi.org/10.2210/pdb2HKK/pdb">https://doi.org/10.2210/pdb2HKK/pdb</a></li> <li>• <b>Classification:</b> <u>LYASE</u></li> <li>• <b>Organism(s):</b> <u>Homo sapiens</u></li> <li>• <b>Mutation(s):</b> No</li> <li>• <b>Deposited:</b> 2006-07-05 <b>Released:</b> 2007-05-22</li> <li>• <b>Deposition Author(s):</b> <u>Temperini, C., Innocenti, A., Vullo, D., Scozzafava, A., Supuran, C.T.</u></li> </ul> <p><b>Experimental Data Snapshot</b></p> <ul style="list-style-type: none"> <li>• <b>Method:</b> X-RAY DIFFRACTION</li> <li>• <b>Resolution:</b> 1.90 Å</li> <li>• <b>R-Value Free:</b> 0.233</li> <li>• <b>R-Value Work:</b> 0.186</li> <li>• <b>R-Value Observed:</b> 0.188</li> </ul>                                                                                                                                       |
|            |                | 7BTS |  | <p>7BTS</p> <p><i>Structure of human beta1 adrenergic receptor bound to epinephrine and nanobody 6B9</i></p> <ul style="list-style-type: none"> <li>• <b>PDB</b><br/>DOI: <a href="https://doi.org/10.2210/pdb7BTS/pdb">https://doi.org/10.2210/pdb7BTS/pdb</a></li> <li>• <b>Classification:</b> <u>MEMBRANE PROTEIN</u></li> <li>• <b>Organism(s):</b> <u>Tequatrovirus T4, Homo sapiens, Vicugna pacos</u></li> <li>• <b>Expression System:</b> <u>Spodoptera frugiperda</u></li> <li>• <b>Mutation(s):</b> Yes</li> <li>• <b>Membrane Protein:</b> <u>Yes</u></li> <li>• <b>Deposited:</b> 2020-04-02 <b>Released:</b> 2020-12-02</li> <li>• <b>Deposition Author(s):</b> <u>Xu, X., Kaindl, J., Clark, M., Hubner, H., Hirata, K., Sunahara, R., Gmeiner, P., Kobilka, B.K., Liu, X.</u></li> </ul> <p><b>Experimental Data Snapshot</b></p> <ul style="list-style-type: none"> <li>• <b>Method:</b> X-RAY DIFFRACTION</li> <li>• <b>Resolution:</b> 3.13 Å</li> <li>• <b>R-Value Free:</b> 0.259</li> <li>• <b>R-Value Work:</b> 0.235</li> <li>• <b>R-Value Observed:</b> 0.237</li> </ul> |

|          |                    |      |                                                                                     |                                                                                                                                                                                                                                                                                                                                                                                                                                                                                                                                                                                                                                                                                                                                                                                                                                                                                                                                                                                                                                                                                                                                                                                                                                            |
|----------|--------------------|------|-------------------------------------------------------------------------------------|--------------------------------------------------------------------------------------------------------------------------------------------------------------------------------------------------------------------------------------------------------------------------------------------------------------------------------------------------------------------------------------------------------------------------------------------------------------------------------------------------------------------------------------------------------------------------------------------------------------------------------------------------------------------------------------------------------------------------------------------------------------------------------------------------------------------------------------------------------------------------------------------------------------------------------------------------------------------------------------------------------------------------------------------------------------------------------------------------------------------------------------------------------------------------------------------------------------------------------------------|
|          | Target<br>Receptor | 2RH1 |    | <p>2RH1</p> <p><i>High resolution crystal structure of human B2-adrenergic G protein-coupled receptor.</i></p> <ul style="list-style-type: none"> <li>• <b>PDB</b><br/>DOI: <a href="https://doi.org/10.2210/pdb2RH1/pdb">https://doi.org/10.2210/pdb2RH1/pdb</a></li> <li>• <b>Classification:</b> <u>MEMBRANE PROTEIN / HYDROLASE</u></li> <li>• <b>Organism(s):</b> <u>Homo sapiens, Tequatrovirus T4</u></li> <li>• <b>Expression System:</b> <u>Spodoptera frugiperda</u></li> <li>• <b>Mutation(s):</b> Yes</li> <li>• <b>Membrane Protein:</b> <u>Yes</u></li> <li>• <b>Deposited:</b> 2007-10-05 <b>Released:</b> 2007-10-30</li> <li>• <b>Deposition Author(s):</b> <u>Cherezov, V., Rosenbaum, D.M., Hanson, M.A., Rasmussen, S.G.F., Thian, F.S., Kobilka, T.S., Choi, H.J., Kuhn, P., Weis, W.I., Kobilka, B.K., Stevens, R.C., Accelerated Technologies Center for Gene to 3D Structure (ATCG3D), GPCR Network (GPCR)</u></li> </ul> <p><b>Experimental Data Snapshot</b></p> <ul style="list-style-type: none"> <li>• <b>Method:</b> X-RAY DIFFRACTION</li> <li>• <b>Resolution:</b> 2.40 Å</li> <li>• <b>R-Value Free:</b> 0.232</li> <li>• <b>R-Value Work:</b> 0.196</li> <li>• <b>R-Value Observed:</b> 0.198</li> </ul> |
| Cortisol | Target<br>Protein  | 2VDX |  | <p>2VDX</p> <p><i>Crystal Structure of the reactive loop Cleaved Corticosteroid Binding Globulin</i></p> <ul style="list-style-type: none"> <li>• <b>PDB</b><br/>DOI: <a href="https://doi.org/10.2210/pdb2VDX/pdb">https://doi.org/10.2210/pdb2VDX/pdb</a></li> <li>• <b>Classification:</b> <u>TRANSPORT PROTEIN</u></li> <li>• <b>Organism(s):</b> <u>Homo sapiens</u></li> <li>• <b>Expression System:</b> <u>Escherichia coli BL21(DE3)</u></li> <li>• <b>Mutation(s):</b> No</li> <li>• <b>Deposited:</b> 2007-10-13 <b>Released:</b> 2008-05-06</li> <li>• <b>Deposition Author(s):</b> <u>Zhou, A., Wei, Z., Read, R.J.</u></li> </ul> <p><b>Experimental Data Snapshot</b></p> <ul style="list-style-type: none"> <li>• <b>Method:</b> X-RAY DIFFRACTION</li> <li>• <b>Resolution:</b> 1.84 Å</li> <li>• <b>R-Value Free:</b> 0.241</li> <li>• <b>R-Value Work:</b> 0.192</li> <li>• <b>R-Value Observed:</b> 0.194</li> </ul>                                                                                                                                                                                                                                                                                                    |

|  |                    |      |                                                                                     |                                                                                                                                                                                                                                                                                                                                                                                                                                                                                                                                                                                                                                                                                                                                                                                                                                                                                                                                                                                                                                                                                                                                                          |
|--|--------------------|------|-------------------------------------------------------------------------------------|----------------------------------------------------------------------------------------------------------------------------------------------------------------------------------------------------------------------------------------------------------------------------------------------------------------------------------------------------------------------------------------------------------------------------------------------------------------------------------------------------------------------------------------------------------------------------------------------------------------------------------------------------------------------------------------------------------------------------------------------------------------------------------------------------------------------------------------------------------------------------------------------------------------------------------------------------------------------------------------------------------------------------------------------------------------------------------------------------------------------------------------------------------|
|  | Target<br>Receptor | 2VDY | 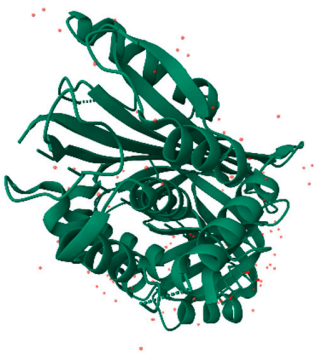   | <p>2VDY</p> <p><i>Crystal structure of the reactive loop cleaved Corticosteroid Binding Globulin complexed with Cortisol</i></p> <ul style="list-style-type: none"> <li>• <b>PDB</b><br/>DOI: <a href="https://doi.org/10.2210/pdb2VDY/pdb">https://doi.org/10.2210/pdb2VDY/pdb</a></li> <li>• <b>Classification:</b> <b>TRANSPORT PROTEIN</b></li> <li>• <b>Organism(s):</b> <u>Homo sapiens</u></li> <li>• <b>Expression System:</b> <u>Escherichia coli BL21(DE3)</u></li> <li>• <b>Mutation(s):</b> No</li> <li>• <b>Deposited:</b> 2007-10-13 <b>Released:</b> 2008-05-13</li> <li>• <b>Deposition Author(s):</b> <u>Zhou, A., Wei, Z., Read, R.J.</u></li> </ul> <p><b>Experimental Data Snapshot</b></p> <ul style="list-style-type: none"> <li>• <b>Method:</b> X-RAY DIFFRACTION</li> <li>• <b>Resolution:</b> 2.30 Å</li> <li>• <b>R-Value Free:</b> 0.271</li> <li>• <b>R-Value Work:</b> 0.210</li> <li>• <b>R-Value Observed:</b> 0.213</li> </ul>                                                                                                                                                                                          |
|  |                    | 4P6X |  | <p>4P6X</p> <p><i>Crystal Structure of cortisol-bound glucocorticoid receptor ligand binding domain</i></p> <ul style="list-style-type: none"> <li>• <b>PDB</b><br/>DOI: <a href="https://doi.org/10.2210/pdb4P6X/pdb">https://doi.org/10.2210/pdb4P6X/pdb</a></li> <li>• <b>Classification:</b> <b>HORMONE RECEPTOR/HORMONE ACTIVATOR</b></li> <li>• <b>Organism(s):</b> <u>Homo sapiens</u></li> <li>• <b>Expression System:</b> <u>Escherichia coli K-12</u></li> <li>• <b>Mutation(s):</b> Yes</li> <li>• <b>Deposited:</b> 2014-03-25 <b>Released:</b> 2014-04-16</li> <li>• <b>Deposition Author(s):</b> <u>He, Y., Zhou, X.E., Tolbert, W.D., Powell, K., Melcher, K., Xu, H.E.</u></li> <li>• <b>Funding Organization(s):</b> National Institutes of Health/National Institute of Diabetes and Digestive and Kidney Disease (NIH/NIDDK), AAF</li> </ul> <p><b>Experimental Data Snapshot</b></p> <ul style="list-style-type: none"> <li>• <b>Method:</b> X-RAY DIFFRACTION</li> <li>• <b>Resolution:</b> 2.50 Å</li> <li>• <b>R-Value Free:</b> 0.276</li> <li>• <b>R-Value Work:</b> 0.246</li> <li>• <b>R-Value Observed:</b> 0.248</li> </ul> |

|               |                    |      |                                                                                     |                                                                                                                                                                                                                                                                                                                                                                                                                                                                                                                                                                                                                                                                                                                                                                                                                                                                                                                                                                                               |
|---------------|--------------------|------|-------------------------------------------------------------------------------------|-----------------------------------------------------------------------------------------------------------------------------------------------------------------------------------------------------------------------------------------------------------------------------------------------------------------------------------------------------------------------------------------------------------------------------------------------------------------------------------------------------------------------------------------------------------------------------------------------------------------------------------------------------------------------------------------------------------------------------------------------------------------------------------------------------------------------------------------------------------------------------------------------------------------------------------------------------------------------------------------------|
| TNF- $\alpha$ | Target<br>Cytokine | 6RMJ | 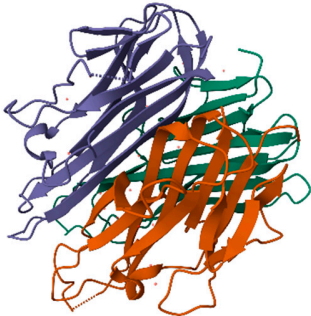   | <p>6RMJ</p> <p><i>Crystal structure of human NGR-TNF</i></p> <ul style="list-style-type: none"> <li>• <b>PDB</b><br/>DOI: <a href="https://doi.org/10.2210/pdb6RMJ/pdb">https://doi.org/10.2210/pdb6RMJ/pdb</a></li> <li>• <b>Classification:</b> <b>CYTOKINE</b></li> <li>• <b>Organism(s):</b> <u>Homo sapiens</u></li> <li>• <b>Expression System:</b> <u>Escherichia coli</u><br/><u>BL21(DE3)</u></li> <li>• <b>Mutation(s):</b> No</li> <li>• <b>Deposited:</b> 2019-05-07 <b>Released:</b> 2019-10-09</li> <li>• <b>Deposition Author(s):</b> <u>Degano, M., Garau, G.</u></li> </ul> <p><b>Experimental Data Snapshot</b></p> <ul style="list-style-type: none"> <li>• <b>Method:</b> X-RAY DIFFRACTION</li> <li>• <b>Resolution:</b> 2.65 Å</li> <li>• <b>R-Value Free:</b> 0.253</li> <li>• <b>R-Value Work:</b> 0.209</li> <li>• <b>R-Value Observed:</b> 0.211</li> </ul>                                                                                                         |
|               | Target<br>Receptor | 5TLJ |  | <p>5TLJ</p> <p><i>COMPLEX BETWEEN HUMAN CD27 AND FAB FRAGMENTS OF ANTIBODIES M2177 AND M2191</i></p> <ul style="list-style-type: none"> <li>• <b>PDB DOI:</b> <a href="https://doi.org/10.2210/pdb5TLJ/pdb">https://doi.org/10.2210/pdb5TLJ/pdb</a></li> <li>• <b>Classification:</b> <b>IMMUNE SYSTEM</b></li> <li>• <b>Organism(s):</b> <u>Mus musculus</u>, <u>Homo sapiens</u></li> <li>• <b>Expression System:</b> <u>Homo sapiens</u>, <u>unidentified baculovirus</u></li> <li>• <b>Mutation(s):</b> No</li> <li>• <b>Deposited:</b> 2016-10-11 <b>Released:</b> 2017-02-08</li> <li>• <b>Deposition Author(s):</b> <u>Tepljakov, A., Obmolova, G., Malia, T., Gilliland, G.L.</u></li> </ul> <p><b>Experimental Data Snapshot</b></p> <ul style="list-style-type: none"> <li>• <b>Method:</b> X-RAY DIFFRACTION</li> <li>• <b>Resolution:</b> 3.50 Å</li> <li>• <b>R-Value Free:</b> 0.356</li> <li>• <b>R-Value Work:</b> 0.283</li> <li>• <b>R-Value Observed:</b> 0.287</li> </ul> |

|              |                 |      |                                                                                     |                                                                                                                                                                                                                                                                                                                                                                                                                                                                                                                                                                                                                                                                                                                                                                                                                                                                                                                                                                                                                                                                         |
|--------------|-----------------|------|-------------------------------------------------------------------------------------|-------------------------------------------------------------------------------------------------------------------------------------------------------------------------------------------------------------------------------------------------------------------------------------------------------------------------------------------------------------------------------------------------------------------------------------------------------------------------------------------------------------------------------------------------------------------------------------------------------------------------------------------------------------------------------------------------------------------------------------------------------------------------------------------------------------------------------------------------------------------------------------------------------------------------------------------------------------------------------------------------------------------------------------------------------------------------|
|              |                 | 6PE7 | 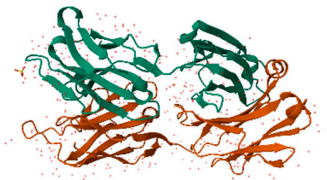   | <p>6PE7</p> <p><i>Crystal Structure of ABBV-323 FAB</i></p> <ul style="list-style-type: none"> <li>• <b>PDB DOI:</b> <a href="https://doi.org/10.2210/pdb6PE7/pdb">https://doi.org/10.2210/pdb6PE7/pdb</a></li> <li>• <b>Classification:</b> <b>IMMUNE SYSTEM</b></li> <li>• <b>Organism(s):</b> <u>Homo sapiens</u></li> <li>• <b>Expression System:</b> <u>Homo sapiens</u></li> <li>• <b>Mutation(s):</b> No</li> <li>• <b>Deposited:</b> 2019-06-20 <b>Released:</b> 2019-08-14</li> <li>• <b>Deposition Author(s):</b> <u>Argiriadi, M.A.</u></li> </ul> <p><b>Experimental Data Snapshot</b></p> <ul style="list-style-type: none"> <li>• <b>Method:</b> X-RAY DIFFRACTION</li> <li>• <b>Resolution:</b> 1.74 Å</li> <li>• <b>R-Value Free:</b> 0.230</li> <li>• <b>R-Value Work:</b> 0.196</li> <li>• <b>R-Value Observed:</b> 0.198</li> </ul>                                                                                                                                                                                                                  |
| IL-1 $\beta$ | Target Receptor | 4GAF |  | <p>4GAF</p> <p><i>Crystal structure of EBI-005, a chimera of human IL-1beta and IL-1Ra, bound to human Interleukin-1 receptor type 1</i></p> <ul style="list-style-type: none"> <li>• <b>PDB DOI:</b> <a href="https://doi.org/10.2210/pdb4GAF/pdb">https://doi.org/10.2210/pdb4GAF/pdb</a></li> <li>• <b>Classification:</b> <b>SIGNALING PROTEIN</b></li> <li>• <b>Organism(s):</b> <u>Homo sapiens</u></li> <li>• <b>Expression System:</b> <u>Escherichia coli</u></li> <li>• <b>Mutation(s):</b> No</li> <li>• <b>Deposited:</b> 2012-07-25 <b>Released:</b> 2013-02-20</li> <li>• <b>Deposition Author(s):</b> <u>Hou, J., Townson, S.A., Kovalchin, J.T., Masci, A., Kiner, O., Shu, Y., King, B., Thomas, C., Garcia, K.C., Furfine, E.S., Barnes, T.M.</u></li> </ul> <p><b>Experimental Data Snapshot</b></p> <ul style="list-style-type: none"> <li>• <b>Method:</b> X-RAY DIFFRACTION</li> <li>• <b>Resolution:</b> 2.15 Å</li> <li>• <b>R-Value Free:</b> 0.271</li> <li>• <b>R-Value Work:</b> 0.215</li> <li>• <b>R-Value Observed:</b> 0.218</li> </ul> |



|       |                |      |                                                                                     |                                                                                                                                                                                                                                                                                                                                                                                                                                                                                                                                                                                                                                                                                                                                                                                                                                                                                                                                                                                                                                      |
|-------|----------------|------|-------------------------------------------------------------------------------------|--------------------------------------------------------------------------------------------------------------------------------------------------------------------------------------------------------------------------------------------------------------------------------------------------------------------------------------------------------------------------------------------------------------------------------------------------------------------------------------------------------------------------------------------------------------------------------------------------------------------------------------------------------------------------------------------------------------------------------------------------------------------------------------------------------------------------------------------------------------------------------------------------------------------------------------------------------------------------------------------------------------------------------------|
|       |                | 4GAI | 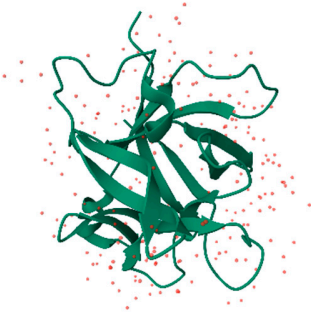   | <p>4GAI</p> <p><i>Crystal structure of EBI-005, a chimera of human IL-1beta and IL-1Ra</i></p> <ul style="list-style-type: none"> <li>• <b>PDB</b><br/>DOI: <a href="https://doi.org/10.2210/pdb4GAI/pdb">https://doi.org/10.2210/pdb4GAI/pdb</a></li> <li>• <b>Classification:</b> <u><b>SIGNALING PROTEIN</b></u></li> <li>• <b>Organism(s):</b> <u>Homo sapiens</u></li> <li>• <b>Expression System:</b> <u>Escherichia coli</u></li> <li>• <b>Mutation(s):</b> No</li> <li>• <b>Deposited:</b> 2012-07-25 <b>Released:</b> 2013-02-20</li> <li>• <b>Deposition Author(s):</b> <u>Hou, J., Townson, S.A., Kovalchin, J.T., Masci, A., Kiner, O., Shu, Y., King, B., Thomas, C., Garcia, K.C., Furfine, E.S., Barnes, T.M.</u></li> </ul> <p><b>Experimental Data Snapshot</b></p> <ul style="list-style-type: none"> <li>• <b>Method:</b> X-RAY DIFFRACTION</li> <li>• <b>Resolution:</b> 1.49 Å</li> <li>• <b>R-Value Free:</b> 0.219</li> <li>• <b>R-Value Work:</b> 0.187</li> <li>• <b>R-Value Observed:</b> 0.189</li> </ul> |
| COX-2 | Target Protein | 5JW1 |  | <p>5JW1</p> <p><i>Crystal structure of Celecoxib bound to S121P murine COX-2 mutant</i></p> <ul style="list-style-type: none"> <li>• <b>PDB</b><br/>DOI: <a href="https://doi.org/10.2210/pdb5JW1/pdb">https://doi.org/10.2210/pdb5JW1/pdb</a></li> <li>• <b>Classification:</b> <u><b>OXIDOREDUCTASE</b></u></li> <li>• <b>Organism(s):</b> <u>Mus musculus</u></li> <li>• <b>Expression System:</b> <u>Spodoptera frugiperda</u></li> <li>• <b>Mutation(s):</b> Yes</li> <li>• <b>Deposited:</b> 2016-05-11 <b>Released:</b> 2016-10-26</li> <li>• <b>Deposition Author(s):</b> <u>Malkowski, M.G., Orlando, B.J.</u></li> </ul> <p><b>Experimental Data Snapshot</b></p> <ul style="list-style-type: none"> <li>• <b>Method:</b> X-RAY DIFFRACTION</li> <li>• <b>Resolution:</b> 2.82 Å</li> <li>• <b>R-Value Free:</b> 0.226</li> <li>• <b>R-Value Work:</b> 0.189</li> <li>• <b>R-Value Observed:</b> 0.191</li> </ul>                                                                                                          |

|  |                    |      |                                                                                     |                                                                                                                                                                                                                                                                                                                                                                                                                                                                                                                                                                                                                                                                                                                                                                                                                                                                                                                                                            |
|--|--------------------|------|-------------------------------------------------------------------------------------|------------------------------------------------------------------------------------------------------------------------------------------------------------------------------------------------------------------------------------------------------------------------------------------------------------------------------------------------------------------------------------------------------------------------------------------------------------------------------------------------------------------------------------------------------------------------------------------------------------------------------------------------------------------------------------------------------------------------------------------------------------------------------------------------------------------------------------------------------------------------------------------------------------------------------------------------------------|
|  | Target<br>Receptor | 4E1G | 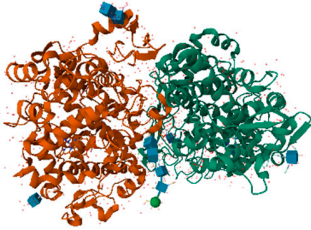   | <p>4E1G</p> <p><i>X-ray crystal structure of alpha-linolenic acid bound to the cyclooxygenase channel of cyclooxygenase-2</i></p> <ul style="list-style-type: none"> <li>• <b>PDB</b><br/>DOI: <a href="https://doi.org/10.2210/pdb4E1G/pdb">https://doi.org/10.2210/pdb4E1G/pdb</a></li> <li>• <b>Classification:</b> <b>OXIDOREDUCTASE</b></li> <li>• <b>Organism(s):</b> <u>Mus musculus</u></li> <li>• <b>Expression System:</b> <u>Spodoptera frugiperda</u></li> <li>• <b>Mutation(s):</b> Yes</li> <li>• <b>Deposited:</b> 2012-03-06 <b>Released:</b> 2012-04-25</li> <li>• <b>Deposition Author(s):</b> <u>Vecchio, A.J., Malkowski, M.G.</u></li> </ul> <p><b>Experimental Data Snapshot</b></p> <ul style="list-style-type: none"> <li>• <b>Method:</b> X-RAY DIFFRACTION</li> <li>• <b>Resolution:</b> 2.10 Å</li> <li>• <b>R-Value Free:</b> 0.203</li> <li>• <b>R-Value Work:</b> 0.159</li> <li>• <b>R-Value Observed:</b> 0.161</li> </ul> |
|  |                    | 3TZI |  | <p>3TZI</p> <p><i>X-ray crystal structure of arachidonic acid bound in the cyclooxygenase channel of G533V murine COX-2</i></p> <ul style="list-style-type: none"> <li>• <b>PDB DOI:</b> <a href="https://doi.org/10.2210/pdb3TZI/pdb">https://doi.org/10.2210/pdb3TZI/pdb</a></li> <li>• <b>Classification:</b> <b>OXIDOREDUCTASE</b></li> <li>• <b>Organism(s):</b> <u>Mus musculus</u></li> <li>• <b>Expression System:</b> <u>Spodoptera frugiperda</u></li> <li>• <b>Mutation(s):</b> Yes</li> <li>• <b>Deposited:</b> 2011-09-27 <b>Released:</b> 2012-04-25</li> <li>• <b>Deposition Author(s):</b> <u>Vecchio, A.J., Malkowski, M.G.</u></li> </ul> <p><b>Experimental Data Snapshot</b></p> <ul style="list-style-type: none"> <li>• <b>Method:</b> X-RAY DIFFRACTION</li> <li>• <b>Resolution:</b> 2.15 Å</li> <li>• <b>R-Value Free:</b> 0.210</li> <li>• <b>R-Value Work:</b> 0.170</li> <li>• <b>R-Value Observed:</b> 0.172</li> </ul>       |

|     |                    |      |                                                                                     |                                                                                                                                                                                                                                                                                                                                                                                                                                                                                                                                                                                                                                                                                                                                                                                                                                                                                                                               |
|-----|--------------------|------|-------------------------------------------------------------------------------------|-------------------------------------------------------------------------------------------------------------------------------------------------------------------------------------------------------------------------------------------------------------------------------------------------------------------------------------------------------------------------------------------------------------------------------------------------------------------------------------------------------------------------------------------------------------------------------------------------------------------------------------------------------------------------------------------------------------------------------------------------------------------------------------------------------------------------------------------------------------------------------------------------------------------------------|
| LOX | Target<br>Receptor | 1YPO |    | <p>1YPO</p> <p><i>Human Oxidized Low Density Lipoprotein Receptor LOX-1 P3 1 21 Space Group</i></p> <ul style="list-style-type: none"> <li>• <b>PDB</b><br/>DOI: <a href="https://doi.org/10.2210/pdb1YPO/pdb">https://doi.org/10.2210/pdb1YPO/pdb</a></li> <li>• <b>Classification:</b> <b>IMMUNE SYSTEM</b></li> <li>• <b>Organism(s):</b> <u>Homo sapiens</u></li> <li>• <b>Expression System:</b> <u>Escherichia coli</u></li> <li>• <b>Mutation(s):</b> No</li> <li>• <b>Deposited:</b> 2005-01-31 <b>Released:</b> 2005-02-08</li> <li>• <b>Deposition Author(s):</b> <u>Park, H., Adsit, F.G., Boyington, J.C.</u></li> </ul> <p><b>Experimental Data Snapshot</b></p> <ul style="list-style-type: none"> <li>• <b>Method:</b> X-RAY DIFFRACTION</li> <li>• <b>Resolution:</b> 3.00 Å</li> <li>• <b>R-Value Free:</b> 0.285</li> <li>• <b>R-Value Work:</b> 0.228</li> <li>• <b>R-Value Observed:</b> 0.228</li> </ul> |
|     |                    | 1YPU |  | <p>1YPU</p> <p><i>Human Oxidized Low Density Lipoprotein Receptor LOX-1 C2 Space Group</i></p> <ul style="list-style-type: none"> <li>• <b>PDB</b><br/>DOI: <a href="https://doi.org/10.2210/pdb1YPU/pdb">https://doi.org/10.2210/pdb1YPU/pdb</a></li> <li>• <b>Classification:</b> <b>IMMUNE SYSTEM</b></li> <li>• <b>Organism(s):</b> <u>Homo sapiens</u></li> <li>• <b>Expression System:</b> <u>Escherichia coli</u></li> <li>• <b>Mutation(s):</b> No</li> <li>• <b>Deposited:</b> 2005-01-31 <b>Released:</b> 2005-02-08</li> <li>• <b>Deposition Author(s):</b> <u>Park, H., Adsit, F.G., Boyington, J.C.</u></li> </ul> <p><b>Experimental Data Snapshot</b></p> <ul style="list-style-type: none"> <li>• <b>Method:</b> X-RAY DIFFRACTION</li> <li>• <b>Resolution:</b> 2.05 Å</li> <li>• <b>R-Value Free:</b> 0.238</li> <li>• <b>R-Value Work:</b> 0.183</li> <li>• <b>R-Value Observed:</b> 0.183</li> </ul>      |
